# The role of the osteopontin–integrin $\alpha v \beta 3$ interaction at implantation: functional analysis using three different *in vitro* models

Youn-Jung Kang<sup>1,2,3</sup>, Karen Forbes<sup>1</sup>, Janet Carver<sup>2</sup>, and John D. Aplin<sup>1,\*</sup>

<sup>1</sup>Maternal and Fetal Health Research Centre, Institute of Human Development, University of Manchester, St. Mary's Hospital, Central Manchester University Hospitals NHS Foundation Trust, Manchester Academic Health Science Centre, Level 5-Research, Manchester, UK <sup>2</sup>Nuffield Department of Obstetrics and Gynaecology, University of Oxford, Level 3 John Radcliffe Hospital, Headington, Oxfordshire, Oxford, UK <sup>3</sup>Present Address: Beth Israel Deaconess Medical Center, Harvard Medical School, 330 Brookline Avenue, CLS 624, Boston, MA, USA

\*Corresponding author. john.aplin@manchester.ac.uk

Submitted on May 13, 2013; resubmitted on October 30, 2013; accepted on November 7, 2013

**STUDY QUESTION:** Does the interaction between integrin and its ligand osteopontin (OPN) mediate embryonic attachment to endometrial epithelium at implantation?

**SUMMARY ANSWER:** OPN of epithelial origin binds the receptor integrin  $\alpha v \beta 3$  at the maternal surface to support adhesion during the early stages of implantation.

**WHAT IS KNOWN ALREADY:** Integrin  $\alpha v \beta 3$  and OPN are both present in the endometrial luminal epithelium in the mid-secretory phase.

**STUDY DESIGN, SIZE, DURATION:** Microscopy of attachment sites of blastocysts (mouse,  $n = 151$ , human,  $n = 8$ ) and OPN- or BSA-coated beads ( $n = 488$ ) interacting with Ishikawa cell monolayers at 24 and 48 h. Levels of epithelial OPN or integrin  $\alpha v \beta 3$  were altered by siRNA-mediated targeting and the results compared with non-targeting siRNA or mock-transfected controls.

**PARTICIPANTS/MATERIALS, SETTING, METHODS:** *In vitro* modelling of early implantation with human endometrial cells (Ishikawa) and mouse or human embryos or ligand-coated beads. Immunolocalization of antigen around attached embryos was measured by image analysis with multiple repeats ( $n > 3$ ), allowing a gradient of relative intensity to be detected. Attachment was quantified using a stability scale and protein expression documented by indirect immunofluorescence. Protein associations were probed by pulldown assays.

**MAIN RESULTS AND THE ROLE OF CHANCE:** Integrin and OPN levels were increased in epithelial cells near to attached embryos. The pulldown assay confirmed OPN-integrin  $\alpha v \beta 3$  binding ( $n > 3$ ). Decreased attachment stability of mouse embryos observed after siRNA knock-down of integrin  $\alpha v \beta 3$  or OPN itself, or OPN-coated beads after knock-down of integrin  $\alpha v \beta 3$ , was tested for significance using Kruskal–Wallis with Dunn's *post hoc* tests.

**LIMITATIONS, REASONS FOR CAUTION:** *In vitro* model. Attachment data using human embryos is limited by embryo availability. Mouse embryo attachment to human cells involves a species crossover so must be interpreted with caution. Ligand-coated beads allow specific molecular interactions mediating attachment to be probed, but obviously lack the adhesion and signaling repertoire of a live embryo.

**WIDER IMPLICATIONS OF THE FINDINGS:** Some of the literature identifies reduced integrin  $\alpha v \beta 3$  expression in infertile endometrium; these findings predict that embryo attachment stability will be reduced *in vivo* if integrin levels are low. We suggest that the robustness of the initial attachment of the embryo affects its ability to progress to the post-epithelial phase of implantation; some poorly attached embryos will be lost.

**STUDY FUNDING/COMPETING INTEREST(S):** No external funds were used for this study, which was supported by funds from the Universities of Manchester and Oxford. None of the authors has any conflict of interest to declare.

**TRIAL REGISTRATION NUMBER:** N/A.

**Key words:** integrin  $\alpha v \beta 3$  / osteopontin / implantation / endometrium

## Introduction

The menstrual cycle-dependent expression of integrin  $\alpha\text{v}\beta 3$  in endometrium was first reported >20 years ago. Maximal levels were observed in the mid-secretory phase (Lessey et al., 1992), suggesting that it might act as a receptor for embryo adhesion at implantation. Many clinical studies have since evaluated  $\alpha\text{v}\beta 3$  expression and its timing in infertility or assisted fertility settings, and there is evidence to correlate reduced or delayed epithelial expression with reduced fertility (Lessey et al., 1994; Lessey et al., 1995), although this has not been consistently observed (Casals et al., 2008; 2012) (further discussed in Lessey, 2011). Introduction of blocking antibodies or arginine-glycine-aspartate (RGD) peptides that target the ligand recognition site of  $\alpha\text{v}\beta 3$  to the uterine cavity of mice and rabbits can reduce the efficiency of embryo implantation. However, since trophoblast may express this and other integrins, there is no clear consensus on whether such reagents are targeting the embryo, the maternal epithelium or stroma or all three (Sutherland et al., 1993; Schultz and Armant, 1995; Campbell et al., 1995b; Illera et al., 2000; Illera et al., 2003; Rout et al., 2004; Chaen et al., 2012). Mice lacking  $\alpha\text{v}$  or  $\beta 3$  are fertile, indicating that whatever the role of  $\alpha\text{v}\beta 3$ , it can be compensated, at least in this species (Bader et al., 1998; Hodivala-Dilke et al., 1999).

Studies have also focused on identifying a ligand for  $\alpha\text{v}\beta 3$  that is present at the time of implantation. A strong candidate is osteopontin (OPN), a secretory product of the luminal and glandular epithelium (Johnson et al., 2003) the expression of which is elevated in the secretory phase in humans (Apparao et al., 2001; Kao et al., 2002; Borthwick et al., 2003) and at implantation in mice and rabbits (Apparao et al., 2003; Chaen et al., 2012). It is up-regulated by progesterone in human endometrium and is found in secretory bodies beneath the apical surface of epithelial cells (Quenby et al., 2007). In mice, it is up-regulated in the epithelium by nidatory estrogen (Chaen et al., 2012). It is precisely localized to the trophoblast–uterine epithelial interface in ruminants in which a longer lived adhesive interaction occurs between the two cell surfaces to produce an epitheliochorial interface (Kim et al., 2010). It contains an RGD site that binds  $\alpha\text{v}\beta 3$  and has binding sites for other integrins (reviewed in Johnson et al., 2003). In an estrogen-dependent process, it can activate vinculin-containing adhesion complexes on the embryo surface that recruit extracellular fibronectin (Chaen et al., 2012). Finally, it forms homo-oligomers that might be able to bridge between receptors on trophoblast and the maternal epithelium. However, mice lacking OPN are broadly fertile (Liaw et al., 1998) and other candidate ligands for  $\alpha\text{v}\beta 3$  (including embryo-derived fibronectin in rats (Kaneko et al., 2013), mice (Schultz and Armant, 1995) and humans (Feinberg et al., 1991) have been put forward.

Implantation remains a bottleneck in assisted reproduction (ART), with high failure rates at this stage. Advances in understanding of the molecular pathways involved have been slow, and direct therapeutic initiatives are almost non-existent. We propose that *in vitro* models will be crucial to identify molecular pathways that might lead to new therapies to improve the rates of implantation of transferred embryos. However, models must be evaluated critically. We and others have reported attachment of human blastocysts to primary epithelial cultures (Bentin-Ley et al., 1999; Meseguer et al., 2001), and others have studied interactions with endometrial stromal (Grewal et al., 2008) or decidual cells (Teklenburg et al., 2010) in efforts to model the post-epithelial phase. Given the practical difficulties associated with access to primary cells and the limited

supply of high-quality human embryos, we suggest the need for accessible and convenient models for the examination of the molecular mechanism. Here, we use Ishikawa cells to model the maternal surface, and examine the role of the integrin  $\alpha\text{v}\beta 3$ –OPN interaction in the attachment of mouse and human embryos. In addition, we introduce a bead attachment assay that allows analysis of adhesive interactions between the apical epithelial surface and putative embryo surface ligands. We derive from all three models results consistent with a role for OPN and  $\alpha\text{v}\beta 3$  in early implantation.

## Materials and Methods

### Cell culture

Ishikawa cells, obtained from American Type Cell Culture, were maintained in Dulbecco's modified Eagle's medium (DMEM) containing 20 mM 2-[4-(2-hydroxyethyl)piperazin-1-yl]ethanesulfonic acid (HEPES) (both Cambrex, UK), 10% v/v foetal bovine serum (Gibco, UK), 1 mM sodium pyruvate (Sigma, UK), 2 mM L-glutamine, 100  $\mu\text{g}/\text{ml}$  streptomycin and 100 IU/ml penicillin. Cells were grown in 95% air and 5%  $\text{CO}_2$  on Matrigel (growth factor-reduced, BD Biosciences, UK) coated 14 mm diameter glass coverslips for immunocytochemistry and siRNA transfection optimization, in Matrigel-coated microwell plates (Corning Costar, Corning Ltd, Sunderland, UK) for bead attachment assays and embryo co-culture, and in culture flasks for pull-down experiments. Matrigel was diluted with ice-cold DMEM (1:8 dilution) and left for 30 min at room temperature for coating. Before plating cells, Matrigel-coated wells were washed three times with ice-cold phosphate buffered saline (PBS).

### Immunocytochemistry

Ishikawa cells and fixed attached embryos were washed twice in PBS, and, where specified, permeabilized for 15 min in PBS containing 0.05% Triton X-100 (Sigma). All incubations and washes (PBS  $3 \times 5$  min) were carried out at room temperature. Cells were blocked using 100  $\mu\text{l}$  per coverslip of 5% w/v bovine serum albumin (BSA) in PBS for 45 min at room temperature. Cells were incubated with the primary antibodies shown in [Supplementary data, Table S1](#) for 2 h at room temperature. Bound primary antibody was then detected using polyclonal swine anti-rabbit fluorescein isothiocyanate (FITC) (DakoCytomation Ltd, Cambridge, UK), polyclonal goat anti-rabbit immunoglobulin G (IgG) alexafluor 568 (Invitrogen) or polyclonal rabbit anti-mouse IgG FITC (DakoCytomation, UK) as appropriate, all at 1:50 for 1 h. Alternatively, to amplify the detection intensity, biotinylated swine anti-rabbit (1:50) was applied for 1 h and then followed with FITC-conjugated Streptavidin (1:50 DakoCytomation, UK). Coverslips were mounted in Vectashield mountant with 4',6-diamidino-2-phenylindole (DAPI; Vector Laboratories, UK) as a nuclear stain. Images were captured using 10 $\times$  and oil immersion 40 $\times$  objectives on a Zeiss AxioObserver inverted microscope (Carl Zeiss, Inc., Europe) with an apotome attachment at 3.12  $\mu\text{m}$  z-increments, or a Leica DMRBE microscope. Images were captured with a Hamamatsu Orca C4742-95 digital camera and analysed with the Openlab software 'Improvision' (Perkin-Elmer, UK).

### Western blotting

Thirty-microgram protein was loaded per well on 8% SDS-polyacrylamide gels. The separated proteins were transferred to polyvinylidene fluoride membranes (Millipore, UK) and blocked with 5% BSA in tris-buffered saline/Tween at room temperature for 1.5 h. Membranes were probed with antibodies (see [Supplementary data, Table S1](#)) against: integrin  $\alpha\text{v}$ , integrin  $\beta 3$ , OPN or  $\beta$ -actin at 4 $^{\circ}\text{C}$  overnight and then washed, incubated with peroxidase-labeled anti-mouse or anti-rabbit IgG secondary antibody

(DAKO) at room temperature for 1 h, washed again, then visualized by enhanced chemiluminescence (Amersham Biosciences, UK). Image J (National Institutes of Health, Bethesda, MD, USA) was used to quantify bands and compare to the loading control.

## Immunoprecipitation

Cells at 90% confluence were washed twice with ice-cold PBS and harvested with RIPA buffer without reducing agents. Cell extracts were clarified by centrifugation (1 min, 12 000g) and the protein concentration was measured (Bio-Rad). In order to reduce non-specific binding of proteins to protein A-coated Sepharose beads (GE Healthcare, Buckinghamshire, UK), 250  $\mu\text{g}$  of cell lysate protein was incubated with the beads for 20 min at room temperature and the beads removed by centrifugation (20 s, 12 000 g). The beads were then added to pre-cleared cell lysates with an optimized volume (15  $\mu\text{l}$ ) of primary antibody against integrin  $\alpha\beta 3$  or OPN. The tube was sealed with Parafilm and placed on a rotary wheel overnight at 4°C. The next day, beads were pelleted and washed with RIPA buffer ( $\times 3$ ) to reduce non-specific binding. Both the supernatant and pellet were mixed with 2 $\times$  sample buffer, heated for 5 min at 95°C, centrifuged (2 min, 12 000 g) then the released protein recovered in the supernatant. Samples were then analysed by western blotting.

## Small interfering RNA

Cells at 40–50% confluency were transfected with Dharmafect-2 (Dharmacon) for 48 h using 0–100 nM small interfering RNA (siRNA) (a combination of four siRNA sequences; OnTarget Plus Smartpool, Dharmacon, UK) targeting, integrin  $\alpha v$  (ITGAV), integrin  $\beta 3$  (ITGB3) or OPN in antibiotic-free medium. All siRNA sequences are given in [Supplementary data, Table S2](#). The effect was compared with a similar concentration of non-targeting control (Dharmacon, UK). Cells were analysed by western blotting.

For embryo attachment experiments, cells were transfected with siRNA targeting OPN, ITGAV or ITGB3, or both integrin subunits together, or non-targeting siRNA (100 nM total concentration) using the Dharmafect-2 transfection reagent for 48 h before mouse embryos were transferred. Non-transfected cells (with only transfection reagent or serum-free DMEM-F12) were used for control experiments.

## Animals, ovulation induction and embryo recovery

All experiments were conducted and licensed under the Animal Act, 1986, and had local ethical approval for care and use of laboratory animals and standards of humane animal care. Two different strains, CBAB6F1 (Maintained by Biomedical Services, John Radcliffe Hospital, University of Oxford) and C57BL/6 (maintained by the Biomedical Services Unit at the University of Manchester), mice were used. Unless otherwise stated, males were caged singly and were <6 months old. All mice were kept under standard environmental conditions of 12 h light: 12 h dark and housed in a conventional holding facility at a controlled room temperature (20–22°C and 40–60% humidity) with food and water provided *ad libitum*.

Female mice (6–8 weeks) were superovulated with 5 IU of pregnant mare serum gonadotrophin (Calbiochem, Nottingham, UK) administered as a 0.1 ml intraperitoneal (IP) injection. Ovulation was synchronized by a 0.1 ml IP injection of 5 IU human chorionic gonadotrophin (hCG, Intervet UK Ltd, Milton Keynes, UK) 46–48 h later. Females were then placed singly with males of the same strain overnight. The presence of a vaginal plug the following morning (Day 1 of pregnancy) was used as an indicator of successful mating. Pregnant mice were sacrificed on Day 2, 48 h after hCG injection. Using sterilized scissors and forceps the lower abdominal cavity was incised and both oviducts dissected following removal of both uterine horns using fine forceps. Two-cell embryos were obtained from

the oviduct either by flushing using a 34G blunt-ended stainless steel needle (Cooper Needleworks, Birmingham, UK) and syringe or by mincing using fine forceps under a microscope. Flushed embryos were washed with M2 media (Sigma) supplemented with 4 mg/ml BSA and subsequently transferred into a 60  $\mu\text{l}$  drop of KSOM (Millipore) for further washing and finally cultured in a drop of 30  $\mu\text{l}$  KSOM covered with mineral oil and incubated at 5%  $\text{CO}_2$ , 37°C until the blastocyst stage. Only expanded blastocysts with a normal morphology observed on Day 5 were included in the study.

## Human embryos

Human embryo work was carried out at the Nuffield Department of Obstetrics and Gynaecology, University of Oxford. Ethical approval for this study was obtained from the Oxfordshire Research Ethics Committee and a research license was obtained from the Human Fertilisation and Embryology Authority. Human embryos were donated for research with informed written consent from patients attending the Oxford Fertility Unit, John Radcliffe Hospital. Ovarian stimulation, oocyte retrieval, insemination and grading for Day 2 embryos were performed in accordance with routine clinical procedures. Embryos were assessed according to morphology and those displaying  $\geq 50\%$  blastomere survival were donated for research and were transferred and cultured in Sydney IVF Blastocyst Medium (Cook Medical Ltd) overlaid with 1 ml of mineral oil (Sigma, UK). Embryos were maintained in culture to the hatched blastocyst stage and those selected as Grades A and B in both trophoctoderm and inner cell mass were transferred onto epithelial layers.

## Embryo attachment assay

Once the Day 5 blastocysts had been collected in a final drop of DMEM, they were transferred unselectively to confluent Ishikawa (untreated and siRNA transfected) cell monolayers in a 96-well plate. Between one and five blastocysts were transferred per well depending upon the total number recovered. Co-cultures were incubated undisturbed at 37°C in a 5%  $\text{CO}_2$  atmosphere for 24 h, then for a further 24 h and finally fixed in 4% paraformaldehyde (BDH, Poole, UK) in PBS for 15 min at room temperature. Embryos were examined under an inverted microscope (Leica, UK) and locations were noted before and after fixation. For immunofluorescence imaging, Matrigel-coated coverslips were used in 24-well plates.

After 24 h of co-culture, the stability of embryo attachment was measured. Before the measurement, the plate was shaken three times from side to side. Each measurement was performed manually under the microscope, examining the stability of each mouse embryo upon tapping the stage. Weakly attached embryos visibly vibrate or show tiny lateral displacements upon tapping, but remain in place at the site of attachment. Based on the stability of attachment, scores were assigned to individual embryos: (i) floating; (ii) weakly attached but detached after tapping; (iii) weakly attached and still attached after tapping; (iv) strongly attached and (v) strongly attached and some trophoblast cells observed to be growing out ([Supplementary data, Fig. S1](#)).

For the data shown in [Fig. 1](#), the surface intensity of integrin  $\alpha\beta 3$  staining was captured from each coverslip and profiled in grey scale. The X-axis indicates the distance (pixel) of each image while the Y-axis shows the grey value of integrin  $\alpha\beta 3$  expression. Image width was 89 300 pixels; each point on the graph shows the average of intensity of  $\alpha\beta 3$  per 5000 pixel. In [Fig. 3](#), each image was also 89 300 pixels in width; each point on the graph shows the average of OPN fluorescence per 10 000 pixel.

## Bead attachment assay

Embryo-sized beads (Affi-gel Blue; Bio-Rad; 80–150  $\mu\text{m}$ ) were washed five times with PBS and incubated in a 20  $\mu\text{l}$  drop of pre-equilibrated OPN or BSA, respectively, for 2 h at 37°C. Subsequently, 30–50 beads were transferred per well of confluent Ishikawa cells on Matrigel-coated coverslips (for microscopy) or 10–15 beads in the wells of a 96-well plate (for siRNA), and maintained in serum-free DMEM-F12 for 24–48 h, then

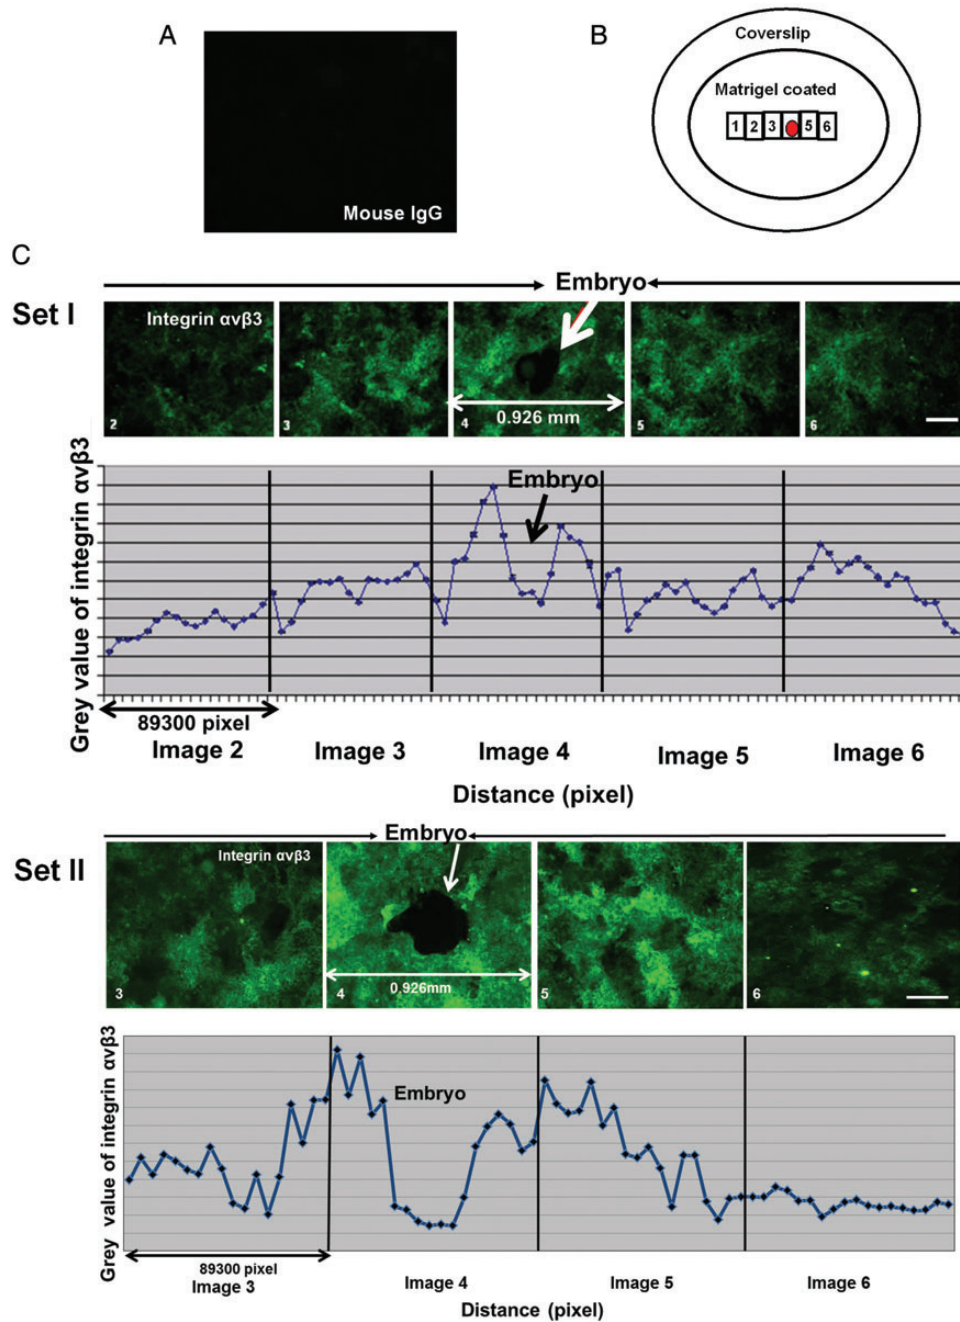

**Figure 1** Integrin  $\alpha v \beta 3$  expression at sites of implantation *in vitro* and the effects of its knock-down by siRNA. **(A)** The first image is a negative control (mouse IgG). **(B)** The locations of the images used in **(C, Set I)** in relation to the site of an attached embryo (red dot) are shown on a diagram of the coverslip. **(C, Set II)** was based on a similar series of seven images. Images were chosen spanning the areas where intensity changes were evident. **(C)** Two sets (I and II) of representative images from 31 independent experiments of integrin  $\alpha v \beta 3$  (antibody LM609) staining on Ishikawa cells co-cultured with mouse embryos. Note the antibody is human specific and therefore does not detect antigen in the embryos. Each attached embryo is located in Image 4 (arrow). After 48 h co-culture, expression of  $\alpha v \beta 3$  was locally increased adjacent to the mouse embryo, while being unaffected further away from the attachment site, as demonstrated in the surface intensity profile. At higher fluorescence capture efficiency, weaker but significant specific staining is detected in regions away from the embryo (compare [Supplementary Fig. S2](#)). Scale bar = 200  $\mu\text{m}$ . **(D)** Two sets (I and II) of representative images of 8 independent experiments of integrin  $\alpha v \beta 3$  staining on Ishikawa cells co-cultured with single human embryos. Note each embryo (located in Image 4 (arrow)) is strongly positive for the integrin. After 60 h co-culture, expression of  $\alpha v \beta 3$  was locally increased adjacent to the embryo, while being unaffected further away from the attachment site. This is demonstrated on the surface intensity profile, scale bar = 200  $\mu\text{m}$ .



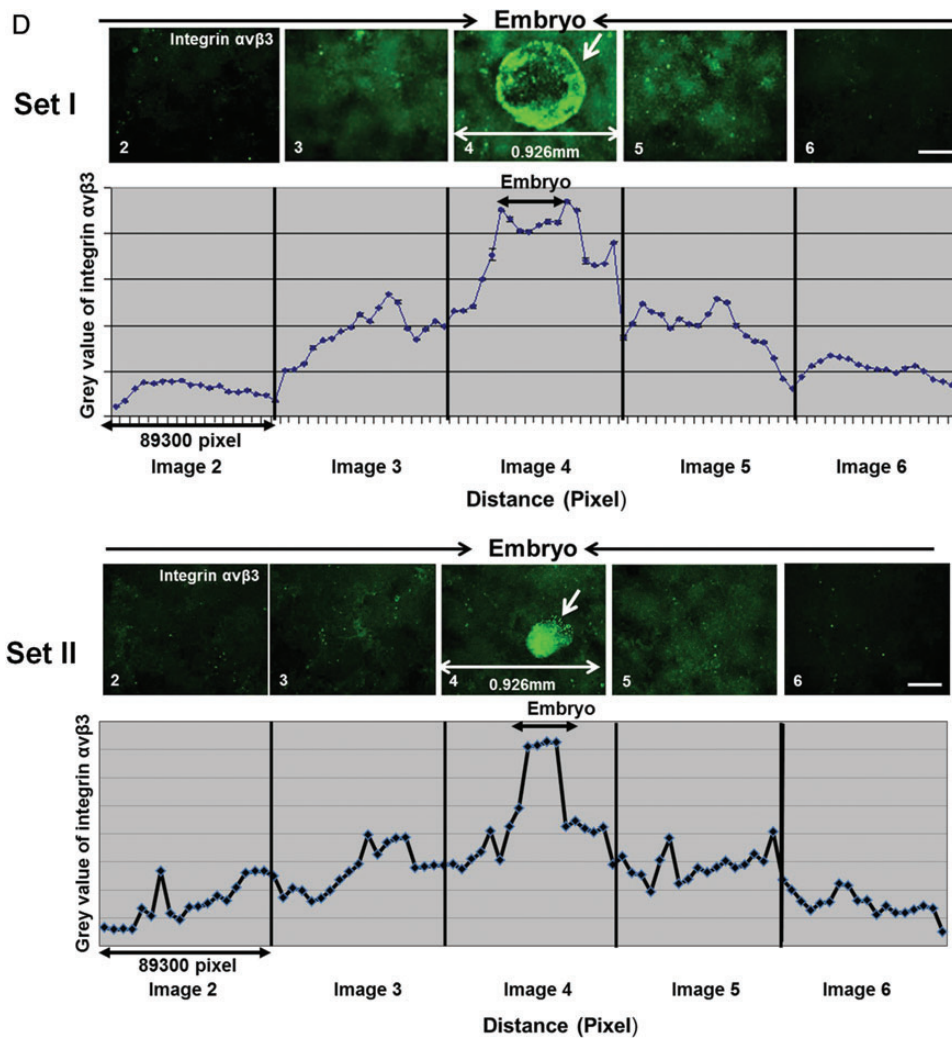

**Figure 1** (continued).

washed gently with PBS and fixed with 4% PFA. The number of attached beads was counted and normalized to the total number of beads transferred. The total number of beads used was BSA 240 and OPN 248.

### Data analysis

Statistical calculations were done using Prism for Windows (GraphPad, Inc., San Diego, CA, USA). Data are presented as medians. Differences were tested with Kruskal–Wallis tests and with Dunn's multiple comparison tests.

## Results

### Integrin $\alpha\beta3$ is locally increased adjacent to attached mouse and human embryos

The presence of the integrin  $\alpha\beta3$  complex was demonstrated by the binding of a well-characterized monoclonal antibody (LM609) to confluent Ishikawa cells. It was detected as a uniform fluorescent signal throughout the monolayer (not shown). Day 5 mouse ( $n = 49$ ; approximately two embryos per well) and Day 6 human ( $n = 8$ ; one embryo per well) blastocysts were transferred to confluent cells and incubated for 48

or 60 h, respectively. Embryos attached stably to the monolayers. Figure 1A is the staining with mouse IgG as a negative control and Fig. 1B is to show the localization of each image including embryo (red spot). The  $\alpha\beta3$  signal was locally elevated at the attachment sites of both mouse (Fig. 1C, Sets I and II) and human (Fig. 1D, Sets I and II) embryos, while being unaffected further away from the attachment site, as revealed by profiling the surface intensity (Fig. 1C and D). Trophoblast in human embryos was strongly stained by the  $\alpha\beta3$  antibody (Fig. 1D). The antibody does not detect the mouse protein so the mouse embryo is seen as a darker area in images (Fig. 1C, Image 4). Attachment to the apical epithelium was followed by penetration of the embryo with displacement of cells, visible in some sites at 48 h (Supplementary data, Fig. S2). The initial attachment stage prior to epithelial displacement was the focus of subsequent experiments.

### Integrin $\alpha\beta3$ knock-down suppresses mouse embryo attachment

Ishikawa cells were transfected with siRNA targeting integrin  $\alpha$  or  $\beta3$  siRNA separately or in combination. Various concentrations of four

different sequences that target different regions were used in each case. Western blotting of cell lysates showed significant knock-down by 48 h after transfection (Fig. 2A). Ishikawa cells co-transfected with siRNA targeting both integrin  $\alpha$  and  $\beta$ 3 at 100 nM for 48 or 72 h showed ~80% reduction in protein expression compared with control cells. There was no effect on  $\beta$ -actin. However, after 72 h of transfection, alterations were evident in Ishikawa cell morphology (data not shown). Therefore, the duration of transfection used was 48 h.

Day 5 mouse embryos ( $n = 68$ ) were transferred after transfection of Ishikawa cells with siRNA to knock-down integrin  $\alpha$ ,  $\beta$ 3 or  $\alpha\beta$ 3, and the stability of attachment was measured after 24 h of co-culture. Embryos on control cells and cells transfected with non-targeting siRNA were significantly more stably attached than embryos co-cultured with cells transfected with integrin  $\alpha$  ( $P < 0.05$ ),  $\beta$ 3 ( $P < 0.05$ ) and  $\alpha\beta$ 3 ( $P < 0.001$ ) siRNA (Fig. 2B). However, after 48 h of co-culture, all embryos had become stably attached.

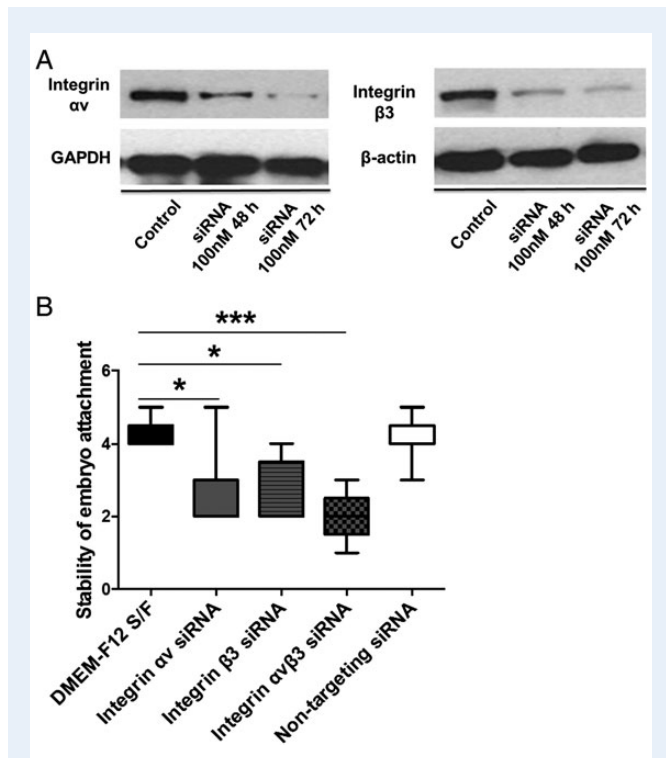

**Figure 2** (A) Western blots to illustrate knock-down of integrin  $\alpha$  and  $\beta$ 3 in Ishikawa cells by 48 h transfection with siRNA at 100 nM. There was an 80% reduction in protein expression compared with control cells. There was no effect on  $\beta$ -actin. (B) Day 5 mouse embryos ( $n = 68$ ) were transferred to confluent Ishikawa after 48 h of siRNA transfection and the stability of attachment measured after a further 24 h. Knock-down of integrin  $\alpha$  or  $\beta$ 3 or both subunits together. Embryos were significantly more stably attached to control cells (far left bar) and cells transfected with non-targeting siRNA (far right bar) than after knock-down of integrin  $\alpha$  ( $P < 0.05$ ),  $\beta$ 3 ( $P < 0.05$ ) or  $\alpha\beta$ 3 ( $P < 0.001$ ). However, after 48 h of co-culture, all mouse embryos had achieved stable attachment (data not shown). Boxes show quartiles, whiskers show range. \* $P < 0.05$ , \*\*\* $P < 0.001$ .

## OPN is locally increased adjacent to attached mouse embryos

OPN, a ligand of integrin  $\alpha\beta$ 3, is present in Ishikawa cells (Apparao et al., 2001; Ramachandran et al., 2013). Mouse embryos were transferred to confluent Ishikawa cells on Matrigel ( $n = 6$ ) and co-cultured for 48 h, during which time attachment occurred. The alteration of OPN distribution in Ishikawa cells near embryo sites was clearly demonstrated by comparing expression in three areas selected by distance. OPN was strongly localized on mouse embryos and adjacent Ishikawa cells, predominantly at the apical cell surface, but also associated with vesicular deposits, while weaker expression was observed in cells further away from the embryo (Fig. 3A, Sets I and II).

To test the hypothesis that OPN acts as a ligand for integrin  $\alpha\beta$ 3, pull-down assays were carried out from Ishikawa cell lysates. Antibodies against  $\alpha\beta$ 3 or OPN were used in immunoprecipitation and the resulting blots probed, respectively, with antibody to OPN or the  $\beta$ 3 subunit. The results demonstrate that  $\alpha\beta$ 3 is complexed with OPN (Fig. 3B). The band intensities suggest that only a fraction of the total integrin pool is bound to OPN.

## OPN knock-down suppresses mouse embryo attachment

Various concentrations of an siRNA pool containing sequences targeting four different regions of OPN were used to treat Ishikawa cells. Western blotting at various time points showed significant knock-down by 48 and 72 h after transfection. There was no effect on  $\beta$ -actin. However, at 72 h alterations were evident in Ishikawa cell morphology (not shown) consistent with a previous report (Ramachandran et al., 2013). Therefore, the duration of transfection used was 48 h (Fig. 4A).

Day 5 mouse embryos ( $n = 28$ ) were transferred after knock-down and the stability of attachment was measured 24 h later. Embryos on control cells and Ishikawa cells transfected with non-targeting siRNA were significantly more stably attached ( $P < 0.0001$ ) than embryos co-cultured with Ishikawa cells transfected with OPN siRNA (Fig. 4B). However, after 48 h, all embryos were fully attached.

## Attachment of OPN-coated beads to Ishikawa cells is an integrin $\alpha\beta$ 3-dependent process

Embryo-sized (80–150  $\mu$ m) microbeads were coated with OPN, then transferred to confluent cells. The beads attached loosely at first and lost their original positions easily but at 48 h remained stably attached to cells during washing and fixation steps (Fig. 5A).

The number of attached beads was scored against the total number originally transferred (~50 per well). At 24 h of co-culture, 8% of beads bearing BSA remained attached on the gel, while ~30% of beads carrying OPN were stably attached. After 48 h co-culture, 12% of beads bearing BSA were attached on the gel, while ~65% of beads carrying OPN remained stably attached. Beads carrying OPN ( $P = 0.0005$ ) exhibited significantly higher attachment at 48 h (Fig. 5B).

## siRNA-mediated knock-down of integrin $\alpha\beta$ 3 suppresses the attachment of beads bearing OPN

Ishikawa cells were transfected with siRNA targeting integrin  $\alpha$ ,  $\beta$ 3 or  $\alpha\beta$ 3 for 48 h and beads bearing OPN ( $n = 662$ ) were then transferred.

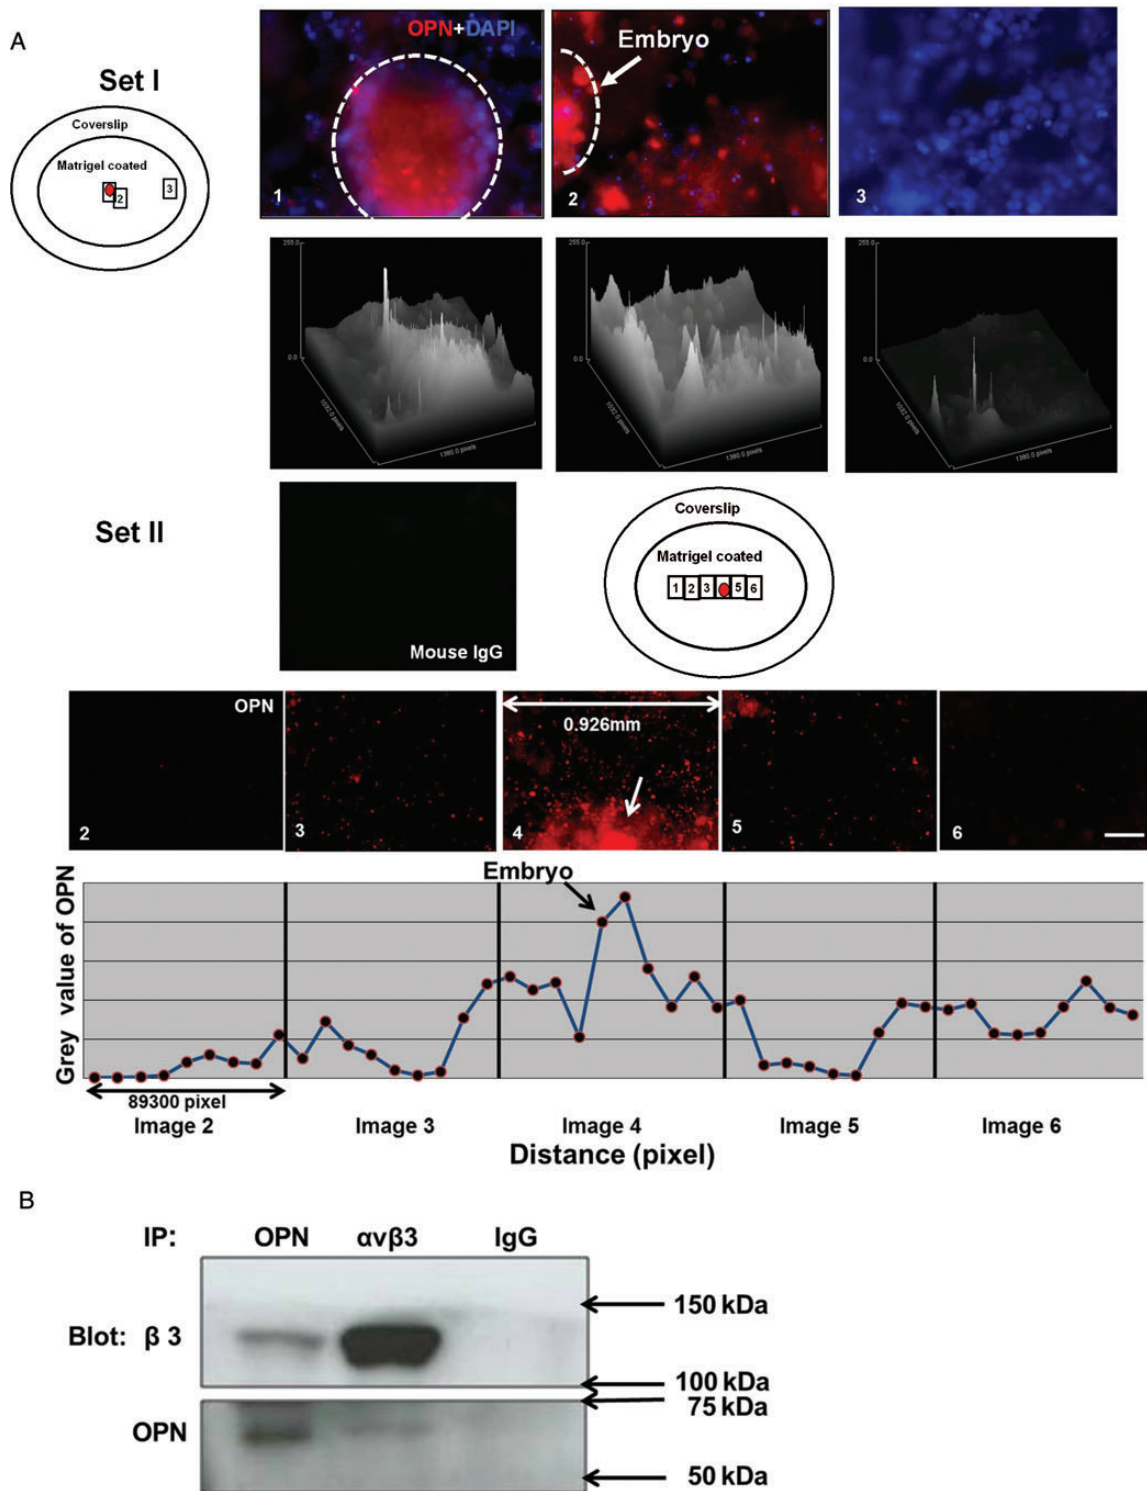

**Figure 3** OPN expression at sites of implantation *in vitro* and interaction with integrin  $\alpha\beta 3$ . **(A)** Set I: a diagram illustrates a coverslip and three areas selected by the distance from the attachment site of mouse embryo (1: at the attachment site, 2: adjacent to the attachment site, 3: away from the embryo). Stronger expression was observed adjacent to the embryo (1 and 2) than in distal areas (3) of the epithelial monolayer. Scale bar = 50  $\mu\text{m}$ . Set II: the first image is a negative control (mouse IgG). The locations of Images 2–6 (from a series of 6) in relation to the site of an attached embryo (red dot, Image 4) are shown in the diagram of the coverslip. After 48 h co-culture, expression of OPN was locally increased adjacent to the mouse embryo, while being unaffected further away from the attachment site, as demonstrated in the surface intensity profile. Scale bar = 200  $\mu\text{m}$ . **(B)** Immunoprecipitates made from Ishikawa cell lysates with antibody to OPN (anti-mouse), integrin  $\alpha\beta 3$  (anti-mouse) or mouse IgG were probed for the integrin  $\beta 3$  subunit using a different antibody (anti-rabbit) or OPN (anti-mouse), respectively, to verify the pull-down. These precipitates contained integrin  $\beta 3$  and OPN.

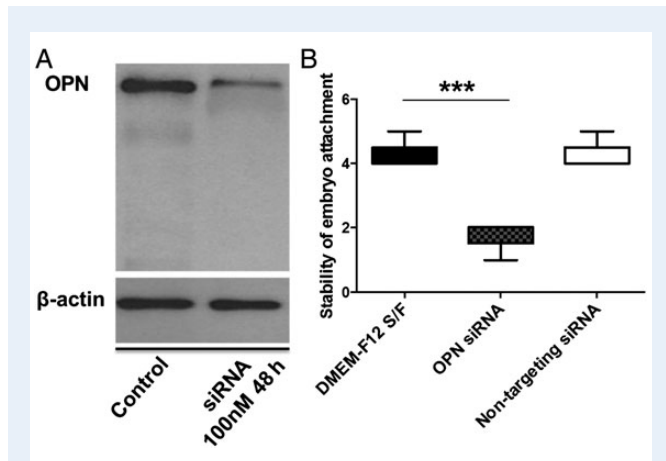

Attachment was significantly reduced in each case ( $P = 0.0023$ ) compared with control cells. In both cases, bead attachment on cells treated with non-targeting siRNA ( $P < 0.01$ ) or mock-transfected cells ( $P < 0.01$ ) were similar to the rate on untreated cells in serum-free medium (Fig. 5C).

Attachment was significantly reduced in each case ( $P = 0.0023$ ) compared with control cells. In both cases, bead attachment on cells treated with non-targeting siRNA ( $P < 0.01$ ) or mock-transfected cells ( $P < 0.01$ ) were similar to the rate on untreated cells in serum-free medium (Fig. 5C).

## Discussion

Elucidating the molecular interactions that govern the earliest phases of embryo-epithelial cross-talk will be of crucial importance in devising ways to improve implantation rates after embryo transfer (Aplin, 2006; Zhang et al., 2013). An ideal *in vitro* model involves a normal human blastocyst interacting with primary human endometrial cells exhibiting the mid-secretory phase phenotype, both from the same donor (Meseguer et al., 2001). Though we and others (Bentin-Ley et al., 1999) have reported the use of such a model, there are practical difficulties: epithelial cells in primary culture are difficult to propagate and may deviate from the *in vivo* phenotype (Campbell et al., 1988, 2000), while human blastocysts are not available in sufficient numbers to carry out inhibition experiments with suitable controls to elucidate a molecular mechanism.

We (Singh et al., 2010) and others (Dominguez et al., 2010) have made use of a model in which mouse (or rat (Kaneko et al., 2011)) embryos interact with human cells. In both species, embryos implant interstitially after a transient interaction with the epithelium, the endometrium exhibits a maternally controlled receptive phase and aspects of the molecular signatures of the embryo and endometrium are similar (Aplin and Singh, 2008). In this work, we chose to use the well-differentiated Ishikawa cell line in which the cell surface and steroid receptor phenotype has notable similarities to normal epithelial cells (Aplin and Singh, 2008; Singh and Aplin, 2009; Hannan et al., 2010; Singh et al., 2010). We suggest that this could provide a starting point for the identification of molecular pathways that would lead to further investigations in more refined (though

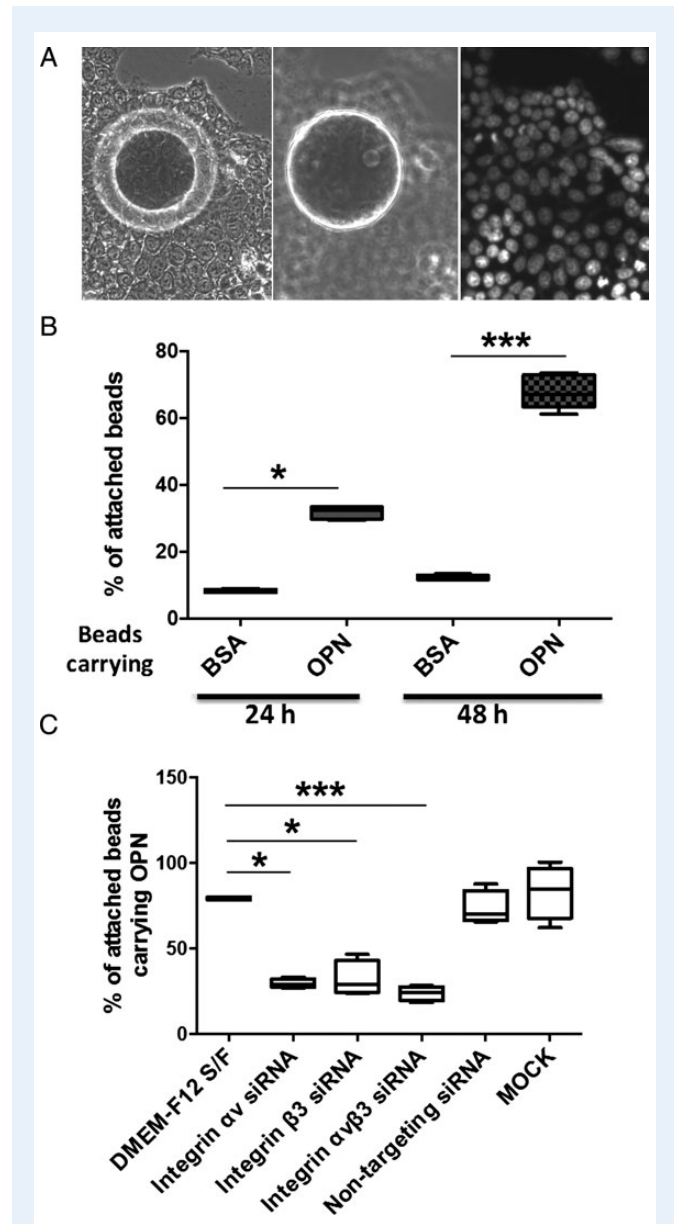

less convenient) models, to test the accuracy of the predictions. Nonetheless, mixing species is controversial. In this study, we set out to compare the role of the integrin  $\alpha v \beta 3$ -OPN interaction using three *in vitro* models with the epithelial cell type in common and different interactors: the human embryo, the mouse embryo and an OPN-coated bead proposed to mimic an embryo expressing OPN at the trophectoderm surface. Similar beads have been used *in vivo* in mice to deliver growth

less convenient) models, to test the accuracy of the predictions. Nonetheless, mixing species is controversial. In this study, we set out to compare the role of the integrin  $\alpha v \beta 3$ -OPN interaction using three *in vitro* models with the epithelial cell type in common and different interactors: the human embryo, the mouse embryo and an OPN-coated bead proposed to mimic an embryo expressing OPN at the trophectoderm surface. Similar beads have been used *in vivo* in mice to deliver growth



factor signals to the luminal epithelium in the peri-implantation period (Paria *et al.*, 2001). Substantial evidence has demonstrated signalling between attaching embryos and maternal cells to influence gene expression in the latter both *in vivo* and *in vitro* (Meseguer *et al.*, 2001; Wang and Dey, 2006; Singh *et al.*, 2010; Teklenburg *et al.*, 2010).

Using an antibody specific to the heterodimer, we confirmed previous data (Lessey *et al.*, 1992; Aplin *et al.*, 1996b) indicating that  $\alpha\text{v}$  is present in endometrial epithelium in complex with  $\beta\text{3}$ , and showed that its abundance increases at the site of attachment of both human and mouse embryos, suggesting a signalling pathway that is yet to be elucidated. *In vivo*,  $\alpha\text{v}\beta\text{3}$  and OPN immunoreactivity are seen in the apical epithelium in both mouse and human endometrium (Aplin *et al.*, 1996b; Quenby *et al.*, 2007). Furthermore, OPN-binding integrins are present in trophoblast in blastocyst stage embryos: we have confirmed here that human blastocysts express  $\alpha\text{v}\beta\text{3}$  (Campbell *et al.*, 1995b), and the same is true of mouse, rat and rabbit (Illera *et al.*, 2003; Rout *et al.*, 2004; Kaneko *et al.*, 2011). There is evidence that OPN secreted by uterine epithelial cells binds to mouse embryos (which have been shown to express  $\alpha\text{v}\beta\text{3}$  on trophoblast (Rout *et al.*, 2004)) and plays a role in the activation of blastocysts for attachment competence (Chaen *et al.*, 2012).

Knock-down experiments were used in all three models to demonstrate a role for  $\alpha\text{v}\beta\text{3}$  and OPN in the attachment of both species of embryo and OPN-coated beads to epithelial cells. The experiments demonstrate that apical attachment stability is impaired when epithelial OPN or  $\alpha\text{v}\beta\text{3}$  levels are reduced, suggesting a model in which OPN acts as a bridging ligand between the uterine epithelium and the trophoblast. Others have provided evidence that CD98, which binds and activates integrin  $\alpha\text{v}\beta\text{3}$  (Kabir-Salmani *et al.*, 2008), is important for embryo attachment (Dominguez *et al.*, 2010). Our embryo attachment data cannot distinguish a role for secreted maternal OPN in indirectly activating the hatched blastocyst (Chaen *et al.*, 2012), from one in which it acts directly as a bridging ligand between  $\alpha\text{v}\beta\text{3}$  on the maternal surface and  $\alpha\text{v}\beta\text{3}$  or another receptor (such as another integrin or CD44 on trophoblast (Behzad *et al.*, 1994; Campbell *et al.*, 1995a,b)). However, the  $\alpha\text{v}\beta\text{3}$ -dependent attachment of OPN-coated beads can most simply be explained by a direct binding interaction. Furthermore, pulldown assays demonstrate this association, though it should be pointed out that only a fraction of the  $\alpha\text{v}\beta\text{3}$  present in lysates made from Ishikawa cells cultured in the absence of embryos is OPN-bound, and so further work will be needed to determine how this might change near attachment sites. In light of the reported fertility of  $\alpha\text{v}$ -null (Bader *et al.*, 1998) and OPN-null (Liaw *et al.*, 1998) mice, it is significant that embryos can overcome the delay imposed by reducing the abundance of  $\alpha\text{v}\beta\text{3}$  or OPN, becoming stably attached at 48 h.

In all likelihood, implantation relies on a cascade involving several molecular pathways (Aplin, 2000; 2006; Aplin and Kimber, 2004; Aplin and Singh, 2008; Singh and Aplin, 2009). However, timing is critically important; a delay occasioned by late onset or impaired expression of one component of the cascade may lead to loss of embryo viability, or failure to rescue the corpus luteum (Wilcox *et al.*, 1999). In mice the mechanism of corpus luteum rescue is different, and early pregnancy loss is not caused by menstruation; rather, the endometrium becomes refractory (Psychoyos, 1986). We believe an expanded suite of *in vitro* models will play a useful role in the fuller elucidation of contributory mechanisms. The addition of the novel bead attachment protocol has allowed a clear demonstration that integrin  $\alpha\text{v}\beta\text{3}$  is available at the apical epithelial

surface for mediating adhesive interactions. Together, the various models will allow further investigation of signalling events leading to modulation of gene expression in maternal epithelial cells at the implantation site, as has been well demonstrated in decidual cells in co-culture with embryos (Teklenburg *et al.*, 2010). Our current work is investigating embryonic signals that modulate the  $\alpha\text{v}\beta\text{3}$ –OPN interaction network.

Implantation is a crucial challenge to the embryo; we have previously observed *in vitro* that embryos attach tenuously to Ishikawa cells, but the initial interaction does not always lead to more stable adhesion (Singh *et al.*, 2010). We have proposed that in human, where abnormal embryos are commonplace, this could allow selection by the maternal system of high-quality embryos (Aplin *et al.*, 1996a; Quenby *et al.*, 2002); selectivity in the earliest stage could account for at least a fraction of the many failed embryo transfers in ART.

## Supplementary data

Supplementary data are available at <http://humrep.oxfordjournals.org/>.

## Acknowledgements

We thank Prof. S.J. Kimber for help with mouse embryos and Dr. Kevin Coward and Prof. Helen Mardon for helpful discussion.

## Authors' roles

Y.J.K. and J.D.A. designed the study. Y.J.K. and K.F. carried out the experimental work. J.C. curated and cultured human embryos. Y.J.K., K.F. and J.D.A. interpreted the results. J.D.A. and Y.J.K. wrote the paper with relevant input from J.C. and K.F.

## Funding

This work was supported by funds from the Universities of Manchester and Oxford.

## Conflict of interest

None declared.

## References

- Aplin JD. The cell biological basis of human implantation. *Baillieres Best Pract Res Clin Obstet Gynaecol* 2000; **14**:757–764.
- Aplin JD. Embryo implantation: the molecular mechanism remains elusive. *Reprod Biomed Online* 2006; **13**:833–839.
- Aplin JD, Kimber SJ. Trophoblast-uterine interactions at implantation. *Reprod Biol Endocrinol* 2004; **2**:48.
- Aplin JD, Singh H. Bioinformatics and transcriptomics studies of early implantation. *Ann N Y Acad Sci* 2008; **1127**:116–120.
- Aplin JD, Hey NA, Li TC. MUC1 as a cell surface and secretory component of endometrial epithelium: reduced levels in recurrent miscarriage. *Am J Reprod Immunol* 1996a; **35**:261–266.
- Aplin JD, Spanswick C, Behzad F, Kimber SJ, Vicovac L. Integrins beta 5, beta 3 and alpha v are apically distributed in endometrial epithelium. *Mol Hum Reprod* 1996b; **2**:527–534.
- Apparao KB, Murray MJ, Fritz MA, Meyer WR, Chambers AF, Truong PR, Lessey BA. Osteopontin and its receptor alphavbeta(3) integrin are

- coexpressed in the human endometrium during the menstrual cycle but regulated differentially. *J Clin Endocrinol Metab* 2001;**86**:4991–5000.
- Apparao KB, Illera MJ, Beyler SA, Olson GE, Osteen KG, Corjay MH, Boggess K, Lessey BA. Regulated expression of osteopontin in the peri-implantation rabbit uterus. *Biol Reprod* 2003;**68**:1484–1490.
- Bader BL, Rayburn H, Crowley D, Hynes RO. Extensive vasculogenesis, angiogenesis, and organogenesis precede lethality in mice lacking all alpha v integrins. *Cell* 1998;**95**:507–519.
- Behzad F, Seif MW, Campbell S, Aplin JD. Expression of two isoforms of CD44 in human endometrium. *Biol Reprod* 1994;**51**:739–747.
- Bentin-Ley U, Sjogren A, Nilsson L, Hamberger L, Larsen JF, Horn T. Presence of uterine pinopodes at the embryo-endometrial interface during human implantation in vitro. *Hum Reprod* 1999;**14**:515–520.
- Borthwick JM, Charnock-Jones DS, Tom BD, Hull ML, Teirney R, Phillips SC, Smith SK. Determination of the transcript profile of human endometrium. *Mol Hum Reprod* 2003;**9**:19–33.
- Campbell S, Swann HR, Aplin JD, Seif MW, Kimber SJ, Elstein M. CD44 is expressed throughout pre-implantation human embryo development. *Hum Reprod* 1995a;**10**:425–430.
- Campbell S, Swann HR, Seif MW, Kimber SJ, Aplin JD. Cell adhesion molecules on the oocyte and preimplantation human embryo. *Hum Reprod* 1995b;**10**:1571–1578.
- Campbell S, Seif MW, Aplin JD, Richmond SJ, Haynes P, Allen TD. Expression of a secretory product by microvillous and ciliated cells of the human endometrial epithelium in vivo and in vitro. *Hum Reprod* 1988;**3**:927–934.
- Campbell S, Larsen J, Seif MW, Allen TD, Knox F, Jones CJ, Aplin JD. Mosaic characteristics of human endometrial epithelium in vitro: analysis of secretory markers and cell surface ultrastructure. *Mol Hum Reprod* 2000;**6**:41–49.
- Casals G, Ordi J, Creus M, Fabregues F, Casamitjana R, Quinto L, Campo E, Balasch J. Osteopontin and alphavbeta3 integrin expression in the endometrium of infertile and fertile women. *Reprod Biomed Online* 2008;**16**:808–816.
- Casals G, Ordi J, Creus M, Fabregues F, Carmona F, Casamitjana R, Balasch J. Expression pattern of osteopontin and alphavbeta3 integrin during the implantation window in infertile patients with early stages of endometriosis. *Hum Reprod* 2012;**27**:805–813.
- Chaen T, Konno T, Egashira M, Bai R, Nomura N, Nomura S, Hirota Y, Sakurai T, Imakawa K. Estrogen-dependent uterine secretion of osteopontin activates blastocyst adhesion competence. *PLoS One* 2012;**7**:e48933.
- Dominguez F, Simon C, Quinonero A, Ramirez MA, Gonzalez-Munoz E, Burghardt H, Cervero A, Martinez S, Pellicer A, Palacin M et al. Human endometrial CD98 is essential for blastocyst adhesion. *PLoS One* 2010;**5**:e13380.
- Feinberg RF, Kliman HJ, Lockwood CJ. Is oncofetal fibronectin a trophoblast glue for human implantation?. *Am J Pathol* 1991;**138**:537–543.
- Grewal S, Carver JG, Ridley AJ, Mardon HJ. Implantation of the human embryo requires Rac1-dependent endometrial stromal cell migration. *Proc Natl Acad Sci USA* 2008;**105**:16189–16194.
- Hannan NJ, Paiva P, Dimitriadis E, Salamonsen LA. Models for study of human embryo implantation: choice of cell lines?. *Biol Reprod* 2010;**82**:235–245.
- Hodivala-Dilke KM, McHugh KP, Tsakiris DA, Rayburn H, Crowley D, Ullman-Cullere M, Ross FP, Collier BS, Teitelbaum S, Hynes RO. Beta3-integrin-deficient mice are a model for Glanzmann thrombasthenia showing placental defects and reduced survival. *J Clin Invest* 1999;**103**:229–238.
- Illera MJ, Cullinan E, Gui Y, Yuan L, Beyler SA, Lessey BA. Blockade of the alpha(v)beta(3) integrin adversely affects implantation in the mouse. *Biol Reprod* 2000;**62**:1285–1290.
- Illera MJ, Lorenzo PL, Gui YT, Beyler SA, Apparao KB, Lessey BA. A role for alphavbeta3 integrin during implantation in the rabbit model. *Biol Reprod* 2003;**68**:766–771.
- Johnson GA, Burghardt RC, Bazer FW, Spencer TE. Osteopontin: roles in implantation and placentation. *Biol Reprod* 2003;**69**:1458–1471.
- Kabir-Salmani M, Fukuda MN, Kanai-Azuma M, Ahmed N, Shiokawa S, Akimoto Y, Sakai K, Nagamori S, Kanai Y, Sugihara K et al. The membrane-spanning domain of CD98 heavy chain promotes alpha(v)beta3 integrin signals in human extravillous trophoblasts. *Mol Endocrinol* 2008;**22**:707–715.
- Kaneko Y, Day ML, Murphy CR. Integrin beta3 in rat blastocysts and epithelial cells is essential for implantation in vitro: studies with Ishikawa cells and small interfering RNA transfection. *Hum Reprod* 2011;**26**:1665–1674.
- Kaneko Y, Murphy CR, Day ML. Extracellular matrix proteins secreted from both the endometrium and the embryo are required for attachment: a study using a co-culture model of rat blastocysts and Ishikawa cells. *J Morphol* 2013;**274**:63–72.
- Kao LC, Tulac S, Lobo S, Imani B, Yang JP, Germeyer A, Osteen K, Taylor RN, Lessey BA, Giudice LC. Global gene profiling in human endometrium during the window of implantation. *Endocrinology* 2002;**143**:2119–2138.
- Kim J, Erikson DW, Burghardt RC, Spencer TE, Wu G, Bayless KJ, Johnson GA, Bazer FW. Secreted phosphoprotein 1 binds integrins to initiate multiple cell signaling pathways, including FRAP1/mTOR, to support attachment and force-generated migration of trophoblast cells. *Matrix Biol* 2010;**29**:369–382.
- Lessey BA. Assessment of endometrial receptivity. *Fertil Steril* 2011;**96**:522–529.
- Lessey BA, Damjanovich L, Coutifaris C, Castelbaum A, Albelda SM, Buck CA. Integrin adhesion molecules in the human endometrium. Correlation with the normal and abnormal menstrual cycle. *J Clin Invest* 1992;**90**:188–195.
- Lessey BA, Castelbaum AJ, Sawin SW, Buck CA, Schinnar R, Bilker W, Strom BL. Aberrant integrin expression in the endometrium of women with endometriosis. *J Clin Endocrinol Metab* 1994;**79**:643–649.
- Lessey BA, Castelbaum AJ, Sawin SW, Sun J. Integrins as markers of uterine receptivity in women with primary unexplained infertility. *Fertil Steril* 1995;**63**:535–542.
- Liaw L, Birk DE, Ballas CB, Whitsitt JS, Davidson JM, Hogan BL. Altered wound healing in mice lacking a functional osteopontin gene (spp1). *J Clin Invest* 1998;**101**:1468–1478.
- Meseguer M, Aplin JD, Caballero-Campo P, O'Connor JE, Martin JC, Remohi J, Pellicer A, Simon C. Human endometrial mucin MUC1 is up-regulated by progesterone and down-regulated in vitro by the human blastocyst. *Biol Reprod* 2001;**64**:590–601.
- Paria BC, Ma W, Tan J, Raja S, Das SK, Dey SK, Hogan BL. Cellular and molecular responses of the uterus to embryo implantation can be elicited by locally applied growth factors. *Proc Natl Acad Sci USA* 2001;**98**:1047–1052.
- Psychoyos A. Uterine receptivity for nidation. *Ann N Y Acad Sci* 1986;**476**:36–42.
- Quenby S, Vince G, Farquharson R, Aplin J. Recurrent miscarriage: a defect in nature's quality control?. *Hum Reprod* 2002;**17**:1959–1963.
- Quenby S, Anim-Somuah M, Kalumbi C, Farquharson R, Aplin JD. Different types of recurrent miscarriage are associated with varying patterns of adhesion molecule expression in endometrium. *Reprod Biomed Online* 2007;**14**:224–234.
- Ramachandran S, Kwon KY, Shin SJ, Kwon SH, Cha SD, Lee HG, Hong YB, Bae I, Lee GH, Cho CH. Regulatory role of osteopontin in malignant transformation of endometrial cancer. *Mol Biol Rep* 2013;**40**:3623–3629.
- Rout UK, Wang J, Paria BC, Armant DR. Alpha5beta1, alphaVbeta3 and the platelet-associated integrin alphaIIb beta3 coordinately regulate adhesion and migration of differentiating mouse trophoblast cells. *Dev Biol* 2004;**268**:135–151.
- Schultz JF, Armant DR. Beta 1- and beta 3-class integrins mediate fibronectin binding activity at the surface of developing mouse peri-implantation blastocysts. Regulation by ligand-induced mobilization of stored receptor. *J Biol Chem* 1995;**270**:11522–11531.

- Singh H, Aplin JD. Adhesion molecules in endometrial epithelium: tissue integrity and embryo implantation. *J Anat* 2009;**215**:3–13.
- Singh H, Nardo L, Kimber SJ, Aplin JD. Early stages of implantation as revealed by an in vitro model. *Reproduction* 2010;**139**:905–914.
- Sutherland AE, Calarco PG, Damsky CH. Developmental regulation of integrin expression at the time of implantation in the mouse embryo. *Development* 1993;**119**:1175–1186.
- Teklenburg G, Salker M, Molokhia M, Lavery S, Trew G, Aojanpong T, Mardon HJ, Lokugamage AU, Rai R, Landles C et al. Natural selection of human embryos: decidualizing endometrial stromal cells serve as sensors of embryo quality upon implantation. *PLoS One* 2010;**5**:e10258.
- Wang H, Dey SK. Roadmap to embryo implantation: clues from mouse models. *Nat Rev Genet* 2006;**7**:185–199.
- Wilcox AJ, Baird DD, Weinberg CR. Time of implantation of the conceptus and loss of pregnancy. *N Engl J Med* 1999;**340**:1796–1799.
- Zhang S, Lin H, Kong S, Wang S, Wang H, Armant DR. Physiological and molecular determinants of embryo implantation. *Mol Aspects Med* 2013;**34**:939–980.
